# Supplementary material for: Corrigendum to &quot;Upper ocean climate of the Eastern Mediterranean Sea during the Holocene Insolation Maximum – a model study&quot; published in Clim. Past, 7, 1103–1122, 2011
Source: Copernicus journal article supplement (doi:10.5194/cp-7-1149-2011), 2011-11-08
Supplement: Supplementary file 1 [file cp-7-1149-2011-supplement.pdf]

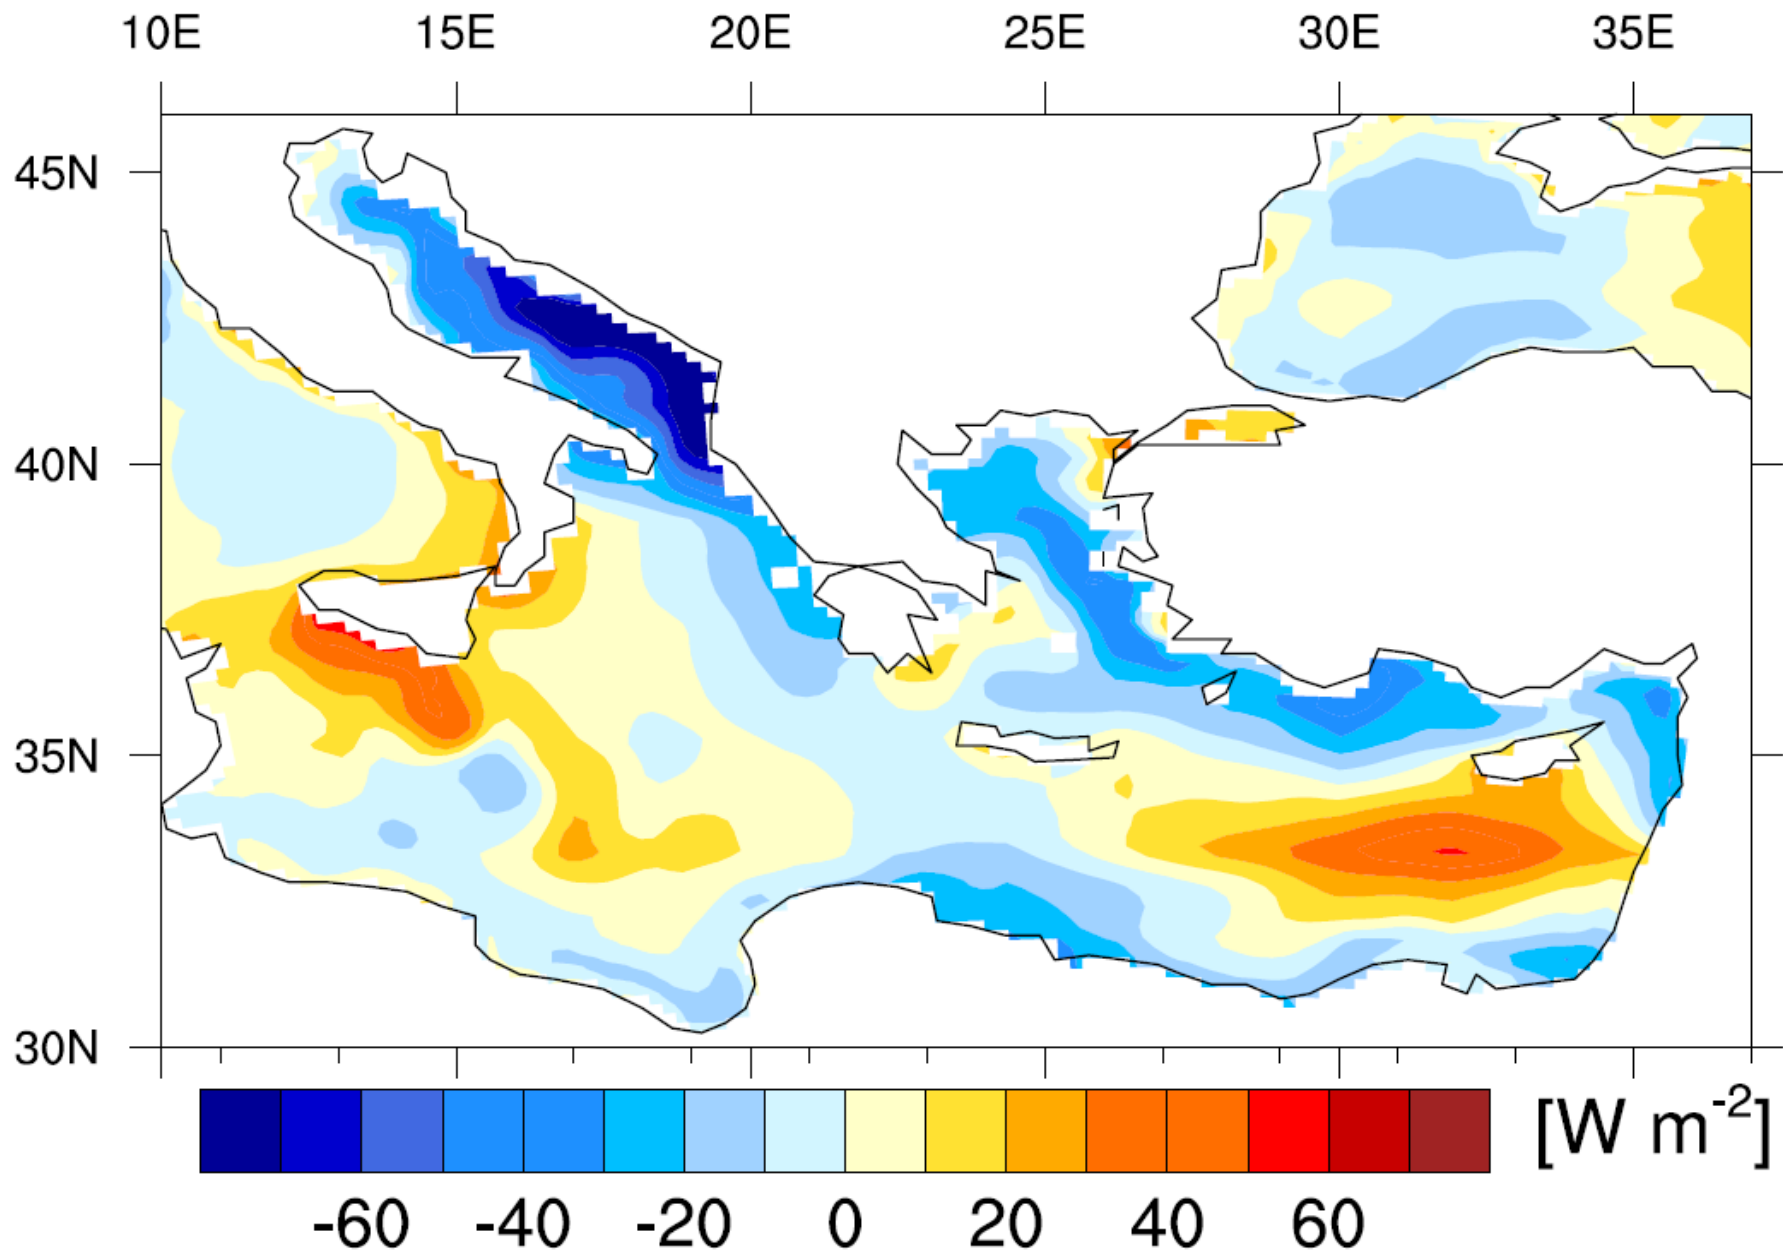

Fig. S1: Annual mean net heat flux at the surface for CTRL.

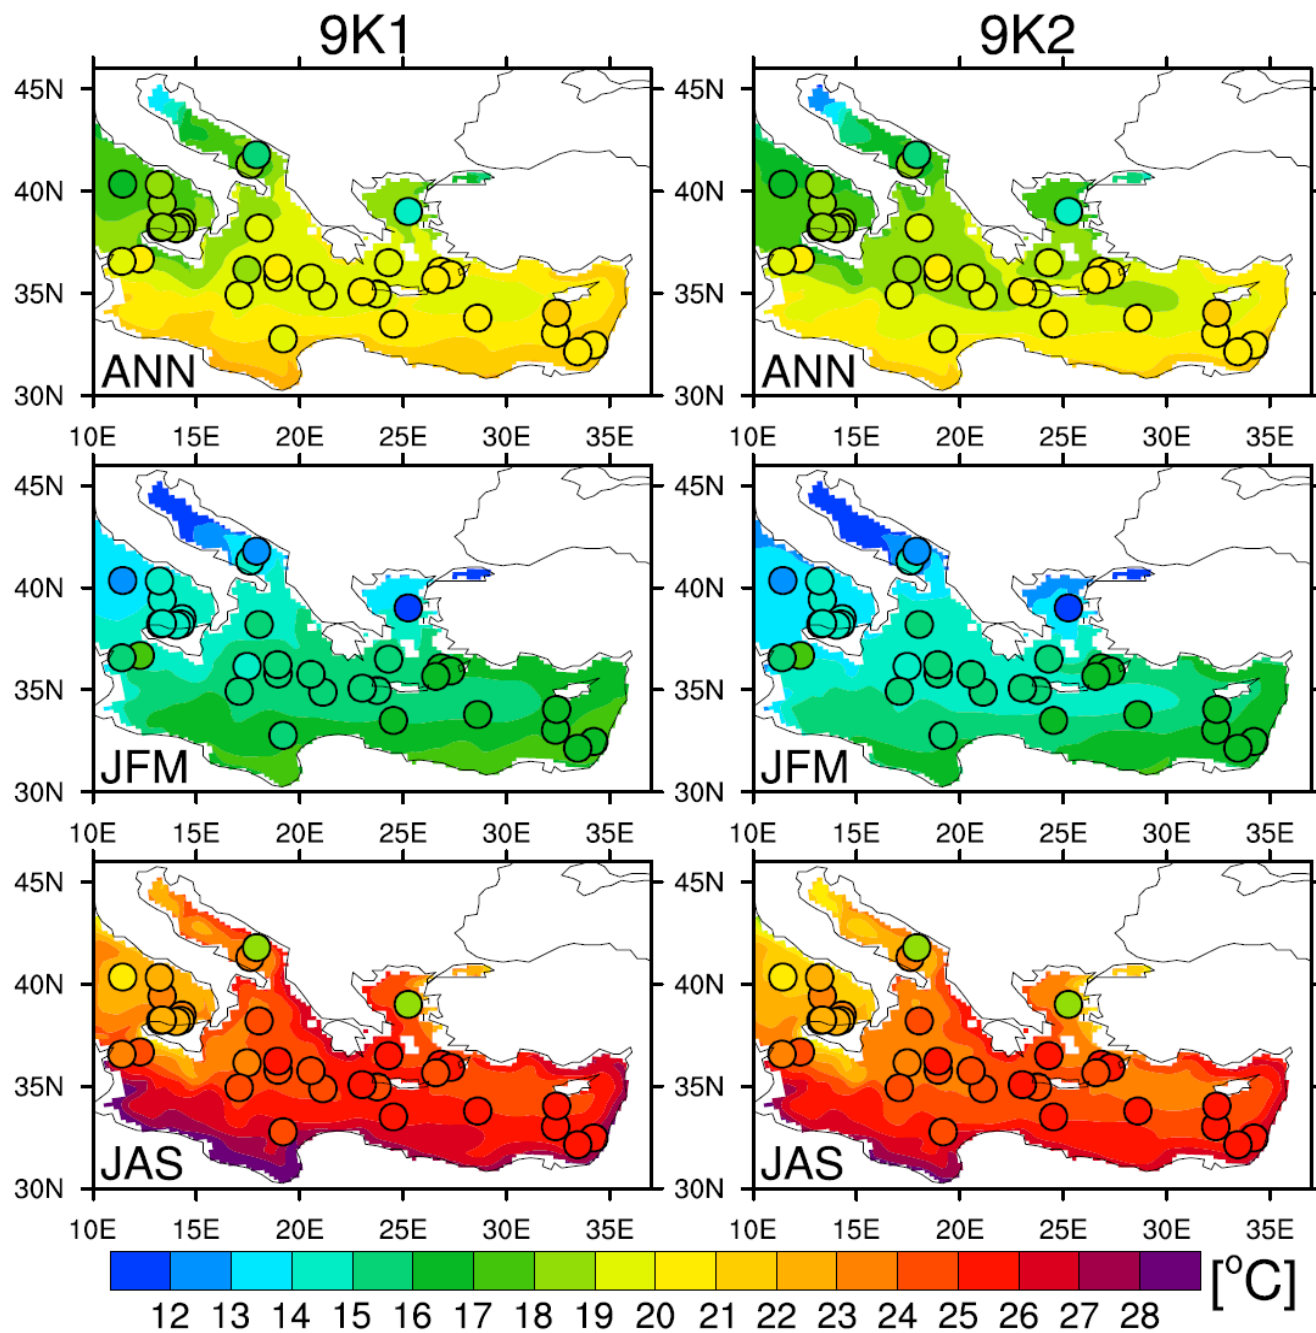

Fig. S2: Annual, winter (JFM) and summer (JAS) SSTs, reconstructed from proxy data (dots, Kucera et al., 2011) vs. modelled one (background color) for 9K1 (left) and 9K2 (right). 1st row displays annual SST, 2nd row displays winter SST, 3rd row displays summer SST.

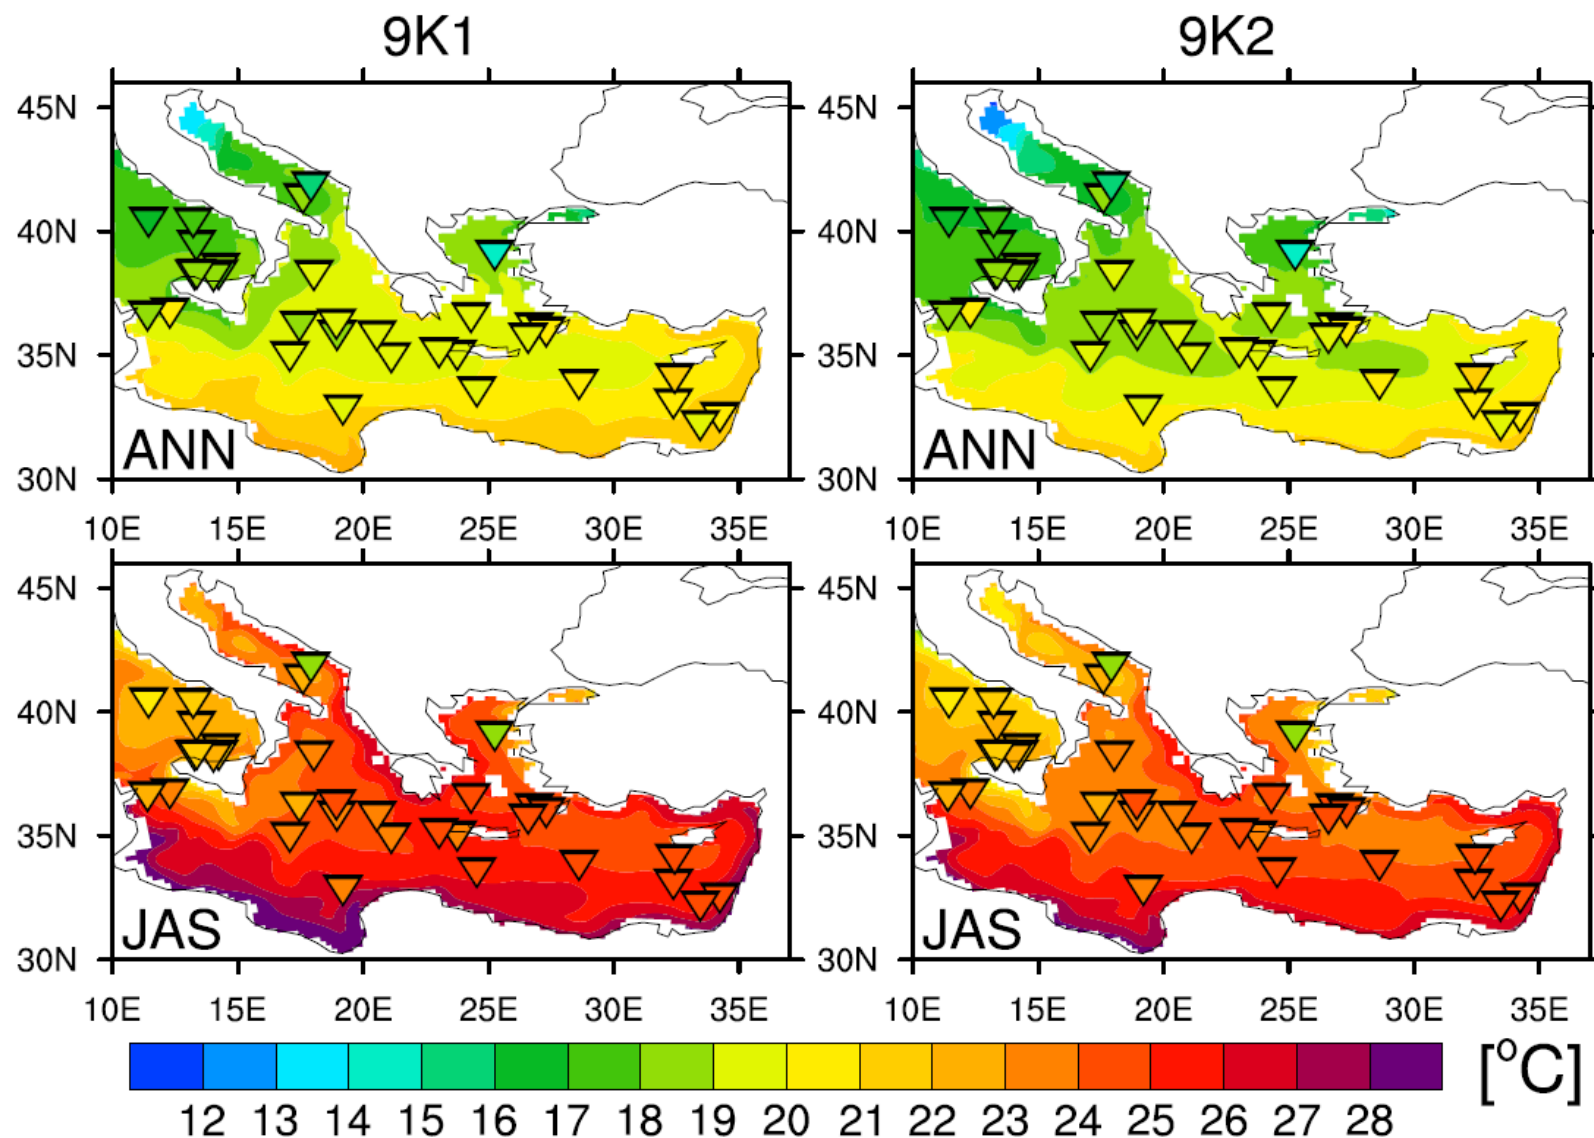

Fig. S3: Annual and summer (JAS)  $T_{0-30}$ , calculated from SST reconstructions from proxy data (triangles, Kucera et al. 2011) vs. modelled one (background color) for 9K1 (left) and 9K2 (right). 1st row displays annual  $T_{0-30}$ , 2nd row displays summer  $T_{0-30}$ .
